# Supplementary material
Source: PubMed Central journal article supplement (PMC10880816)
Supplement: NIHMS1958878-supplement-suppl__figures.pdf [file NIHMS1958878-supplement-suppl__figures.pdf]

# Figure S1

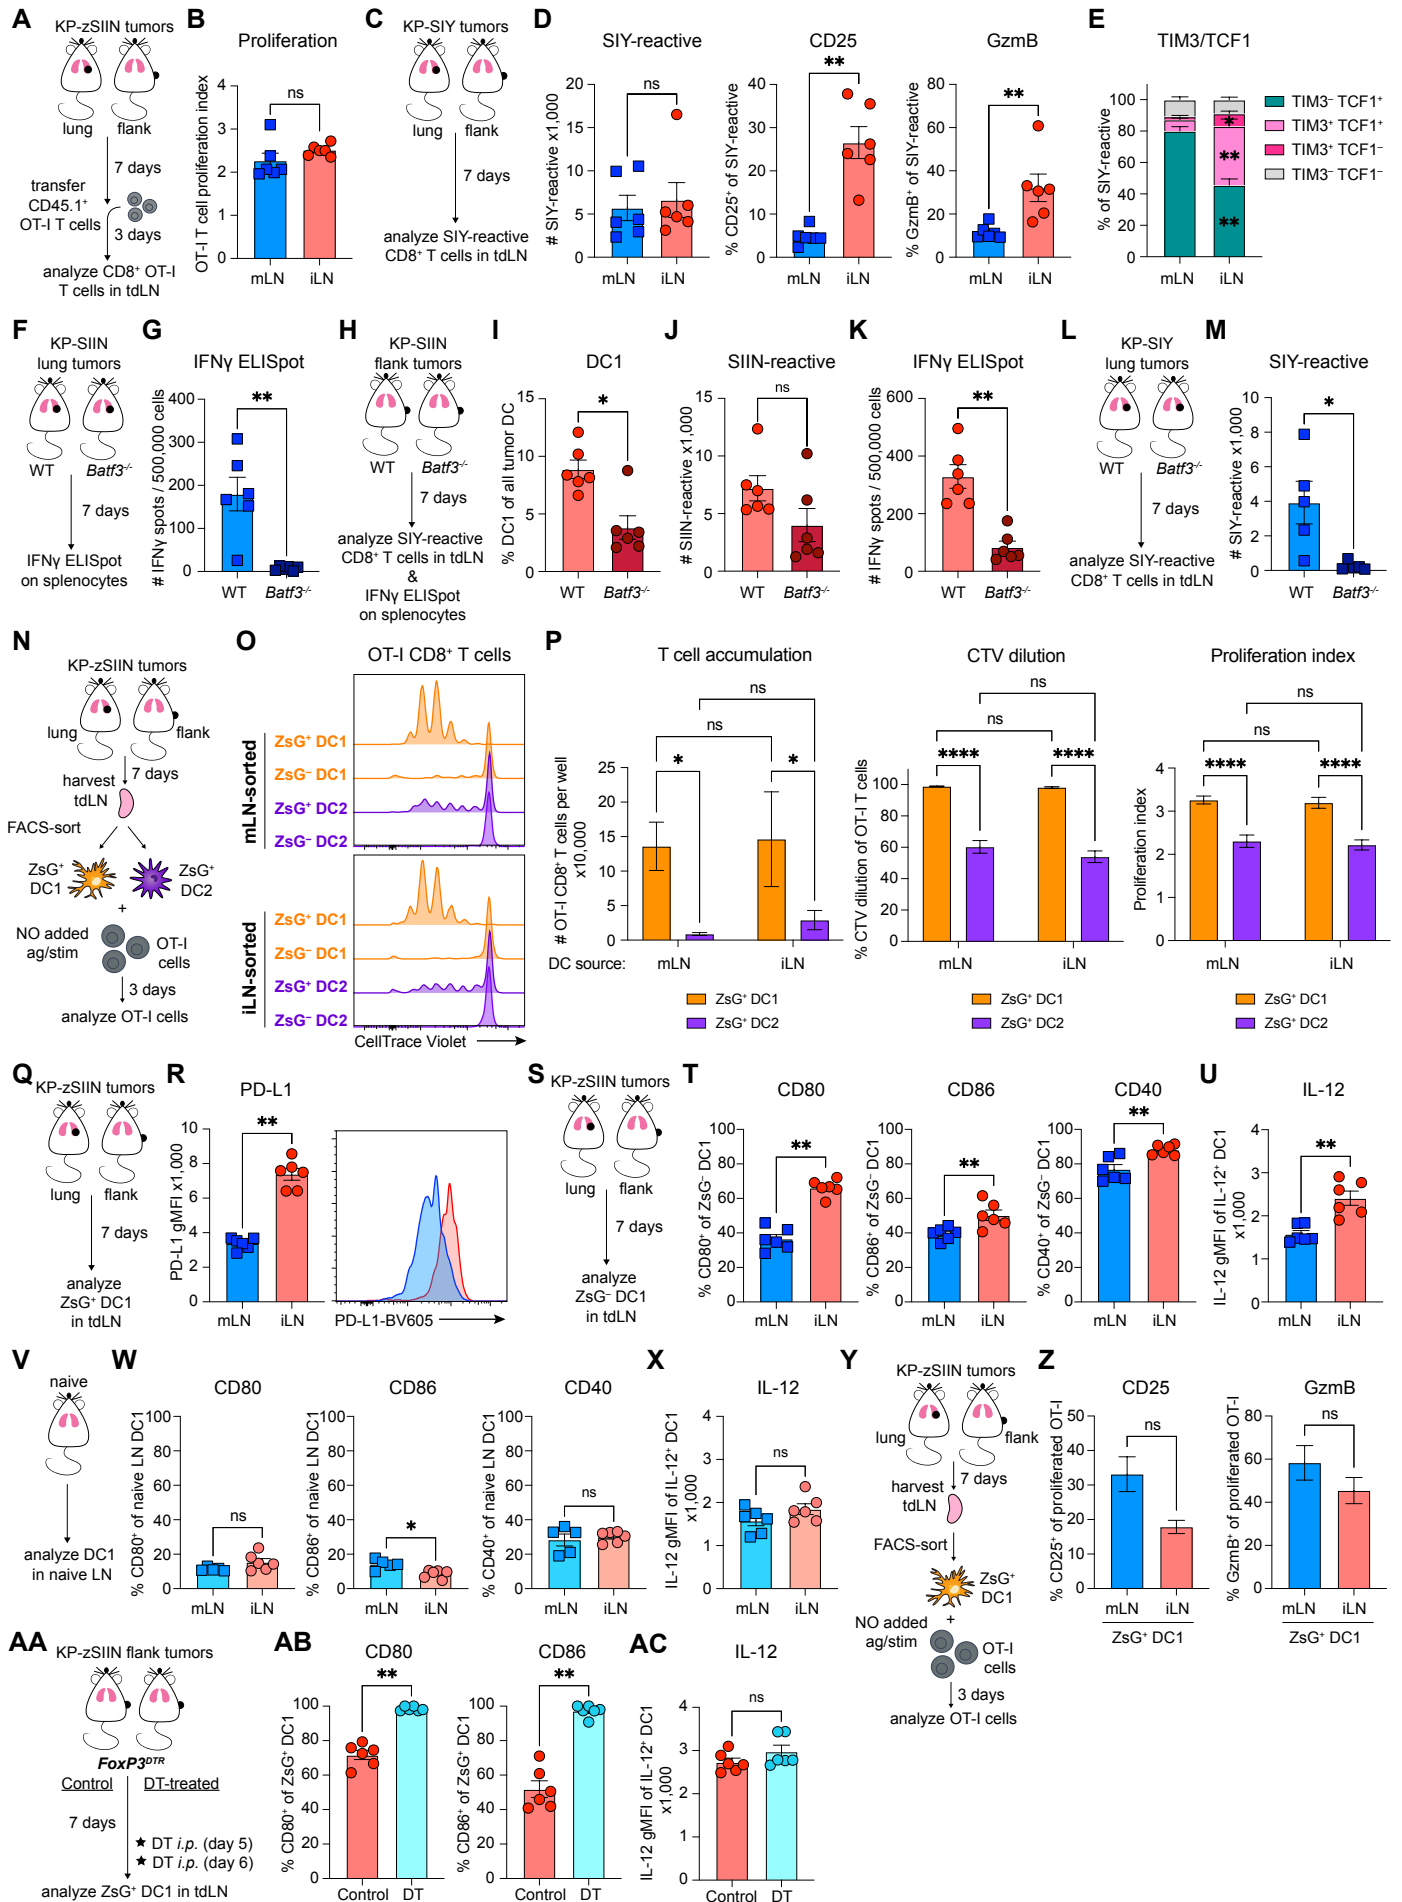

**Figure S1. Related to Main Figures 1-3: DC1 prime dysfunctional CD8<sup>+</sup> T cells against lung but not flank KP tumors.**

(A) Experimental design for (B).

(B) Proliferation index of adoptively-transferred CTV-labelled OT-I T cells from tdLN, day 10 post-tumor implantation (n=3 mice/group; two independent experiments).

(C) Experimental design for (D-E).

(D-E) Quantification of (D) numbers, CD25, GzmB, (E) TCF1 and TIM-3 expression of SIY-reactive CD8<sup>+</sup> T cells in tdLN, day 7 post-tumor implantation (n=3 mice/group; two independent experiments).

(F) Experimental design for (G).

(G) ELISpot quantification of IFN $\gamma$ -producing splenocytes from WT and *Batf3*<sup>-/-</sup> mice bearing lung KP-zSIIN tumors, day 7 post-tumor inoculation (n=3 mice/group; two independent experiments).

(H) Experimental design for (I-K).

(I-J) Quantification of (I) DC1 frequency in tumors and (J) numbers of SIIN-reactive CD8<sup>+</sup> T cells in iLN from WT or *Batf3*<sup>-/-</sup> mice, day 7 post-tumor implantation (n=3 mice/group; two independent experiments).

(K) ELISpot quantification of IFN $\gamma$ -producing splenocytes from WT and *Batf3*<sup>-/-</sup> mice bearing flank KP-zSIIN tumors, day 7 post-tumor inoculation (n=3 mice/group; two independent experiments).

(L) Experimental design for (M).

(M) Numbers of SIY-reactive CD8<sup>+</sup> T cells in mLN of tumor-bearing WT or *Batf3*<sup>-/-</sup> mice, day 7 post-tumor implantation (n=2-3 mice/group; two independent experiments).

(N) Experimental design for (O-P).

(O-P) (O) Representative histograms and (P) quantified proliferation of CTV-labelled OT-I T cells after 3-day co-culture with DC subsets sorted from tdLN (50 tdLN pooled for sorting, three independent experiments).

(Q) Experimental design for (R).

(R) Representative histogram and PD-L1 expression on ZsG<sup>+</sup> DC1 from tdLN, day 7 post-tumor implantation (LN from 3-4 mice pooled per datapoint; two independent experiments).

(S) Experimental design for (T-U).

(T-U) Expression of (T) CD80, CD86, CD40 and (U) IL-12 on ZsG<sup>-</sup> DC1 from tdLN, day 7 post-tumor implantation (LN from 3-4 mice pooled per datapoint; two independent experiments).

(V) Experimental design for (W-X).

(W-X) Expression of (W) CD80, CD86, CD40 and (X) IL-12 on DC1 from LN of naïve mice (n=2-3 mice/group; two independent experiments).

(Y) Experimental design for (Z).

(Z) CD25 and GzmB expression on proliferated OT-I T cells after co-culture with ZsG<sup>+</sup> DC1 sorted from tdLN at day 7 post-tumor implantation. (50 tdLN pooled for sorting, three independent experiments).

(AA) Experimental design for (AB-AC).

(AB-AC) Expression of (AB) CD80, CD86 and (AC) IL-12 on ZsG<sup>+</sup> DC1 from iLN of control or DT-treated tumor-bearing *FoxP3*<sup>DTR</sup> mice, day 7 post-tumor implantation (iLN from 2 mice pooled per datapoint; two independent experiments).

\*p<0.05, \*\*p<0.01, \*\*\*\*p<0.0001, ns=not significant; MWU (B,D-E,G,I-K,M,R,T-U,W-X,Z,AB-AC), two-way ANOVA (P). Data shown as mean  $\pm$  SEM.

# Figure S2

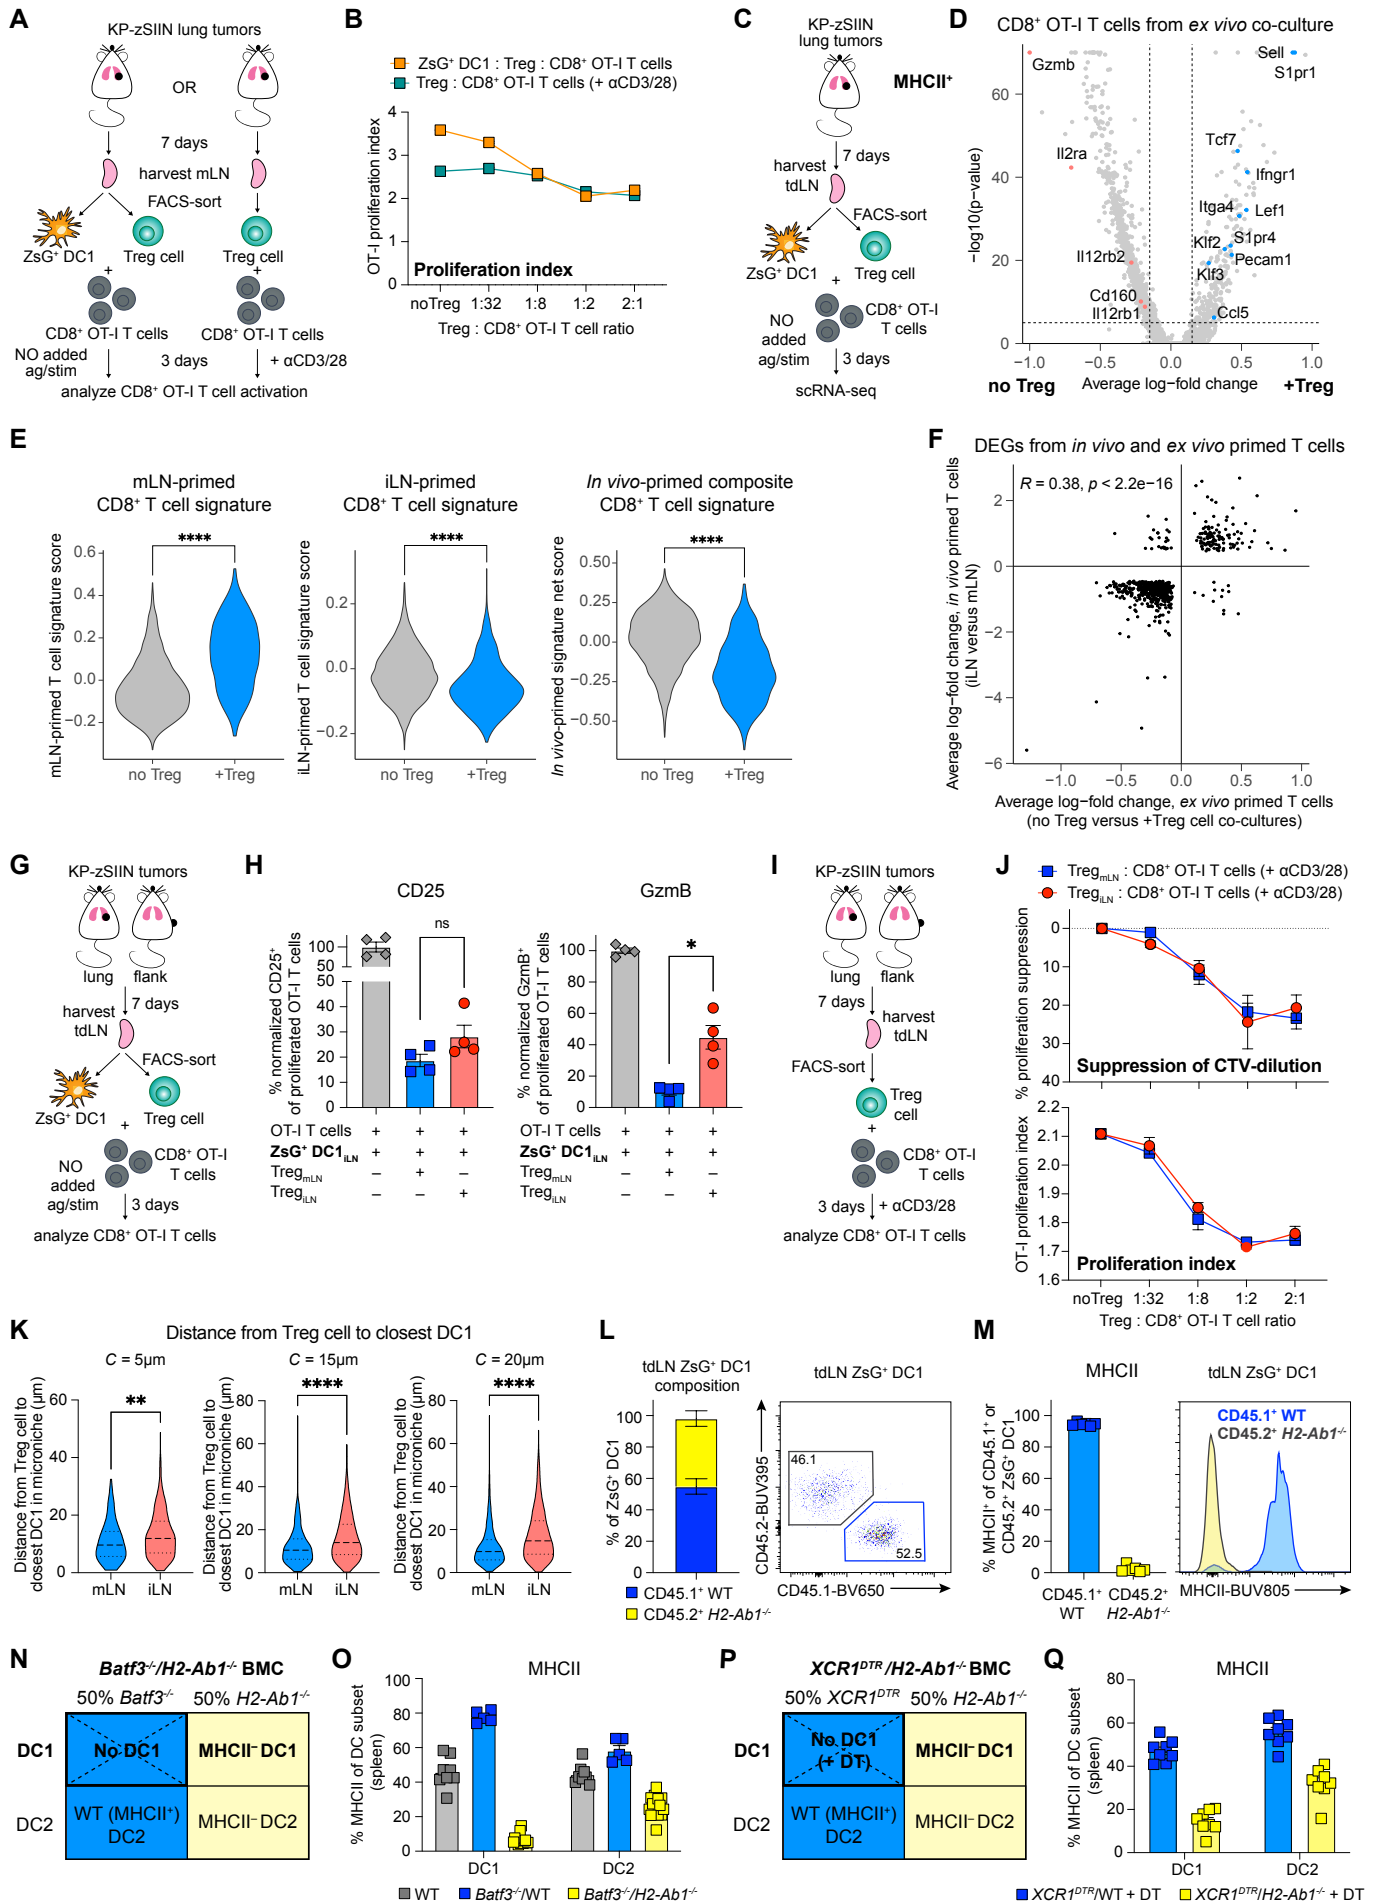

**Figure S2. Related to Main Figure 4 and 5: Treg cells from the tumor-draining mLN can induce CD8<sup>+</sup> T cell dysfunction by suppressing DC1.**

(A) Experimental design for (B).

(B) Representative example of the proliferation index of CTV-stained OT-I T cells after 3-day co-culture with (*orange*) mLN-sorted ZsG<sup>+</sup> DC1 and Treg cells or (*teal*) mLN-sorted Treg cells with  $\alpha$ CD3/ $\alpha$ CD28-stimulation (50 tdLN pooled for sorting, three independent experiments).

(C) Experimental design for (D-F).

(D) Volcano plot of DEGs between OT-I T cells cultured *ex vivo* with mLN-sorted ZsG<sup>+</sup> DC1 in the absence or presence of mLN-sorted Treg cells. Select DEGs from no Treg (red) or Treg cell-containing (*red*) co-culture conditions are highlighted.

(E) Violin plots of *ex vivo*-primed OT-I T cell enrichment for signatures of *in vivo*-primed CD8<sup>+</sup> 2C T cells from the mLN and iLN of KP-SIY tumor-bearing mice, from Horton *et al.* (2021).

(F) Comparison between log-fold change values of DEGs of *ex vivo*-primed OT-I T cells (cultured for 3 days in the presence or absence of Treg cells) and *in vivo*-primed adoptively-transferred CD8<sup>+</sup> 2C T cells (isolated from KP-SIY tumor-draining iLN or mLN 3 days after adoptive transfer, day 10 post-tumor implantation). Spearman's correlation and the associated p-value are shown.

(G) Experimental design for (H).

(H) CD25 and GzmB expression on proliferated OT-I T cells after 3-day co-culture with iLN-sorted ZsG<sup>+</sup> DC1 and either mLN- or iLN-sorted Treg cells (50 tdLN pooled for sorting, three independent experiments).

(I) Experimental design for (J).

(J) Representative example of (*top*) suppression of proliferation frequency and (*bottom*) proliferation index of  $\alpha$ CD3/ $\alpha$ CD28-stimulated CTV-stained OT-I T cells after 3-day co-culture with (*blue*) mLN-sorted Treg cells or (*red*) iLN-sorted Treg cells (50 tdLN pooled for sorting, three independent experiments).

(K) Distance from Treg cell to closest DC1 within microniche in tdLN, using microniche radius equal to  $r_{\text{cluster}} + C$ , where  $C$  is (*left*) 5 $\mu$ m, (*middle*) 15 $\mu$ m or (*right*) 20 $\mu$ m (n=4 mice/group including 399 mLN microniches and 74 iLN microniches; representative data from one of two independent experiments).

(L-M) Representative flow plot and quantification of (L) ZsG<sup>+</sup> DC1 composition and (M) MHCII expression on ZsG<sup>+</sup> DC1 in mLN of tumor-bearing WT/*H2-Ab1*<sup>-/-</sup> BMCs, day 7 post-tumor implantation (mLN from 3-4 mice pooled per datapoint; two independent experiments).

(N) Expected DC composition in *Batf3*<sup>-/-</sup>/*H2-Ab1*<sup>-/-</sup> BMCs.

(O) Observed DC composition in spleens of tumor-bearing WT, *Batf3*<sup>-/-</sup>/*WT* and *Batf3*<sup>-/-</sup>/*H2-Ab1*<sup>-/-</sup> BMCs, day 10 post-tumor implantation (n=2-5 mice/group; 1-4 independent experiments).

(P) Expected DC composition in DT-treated *XCR1*<sup>DTR</sup>/*H2-Ab1*<sup>-/-</sup> BMCs.

(Q) Observed DC composition in spleens of DT-treated tumor-bearing *XCR1*<sup>DTR</sup>/*WT* and *XCR1*<sup>DTR</sup>/*H2-Ab1*<sup>-/-</sup> BMCs, day 10 post-tumor implantation (n=3-4 mice/group; two independent experiments).

\*p<0.05, \*\*p<0.01, \*\*\*\*p<0.0001, ns=not significant; MWU with Bonferroni correction (D), MWU (E,H,K). Data shown as mean  $\pm$  SEM.



# Figure S3

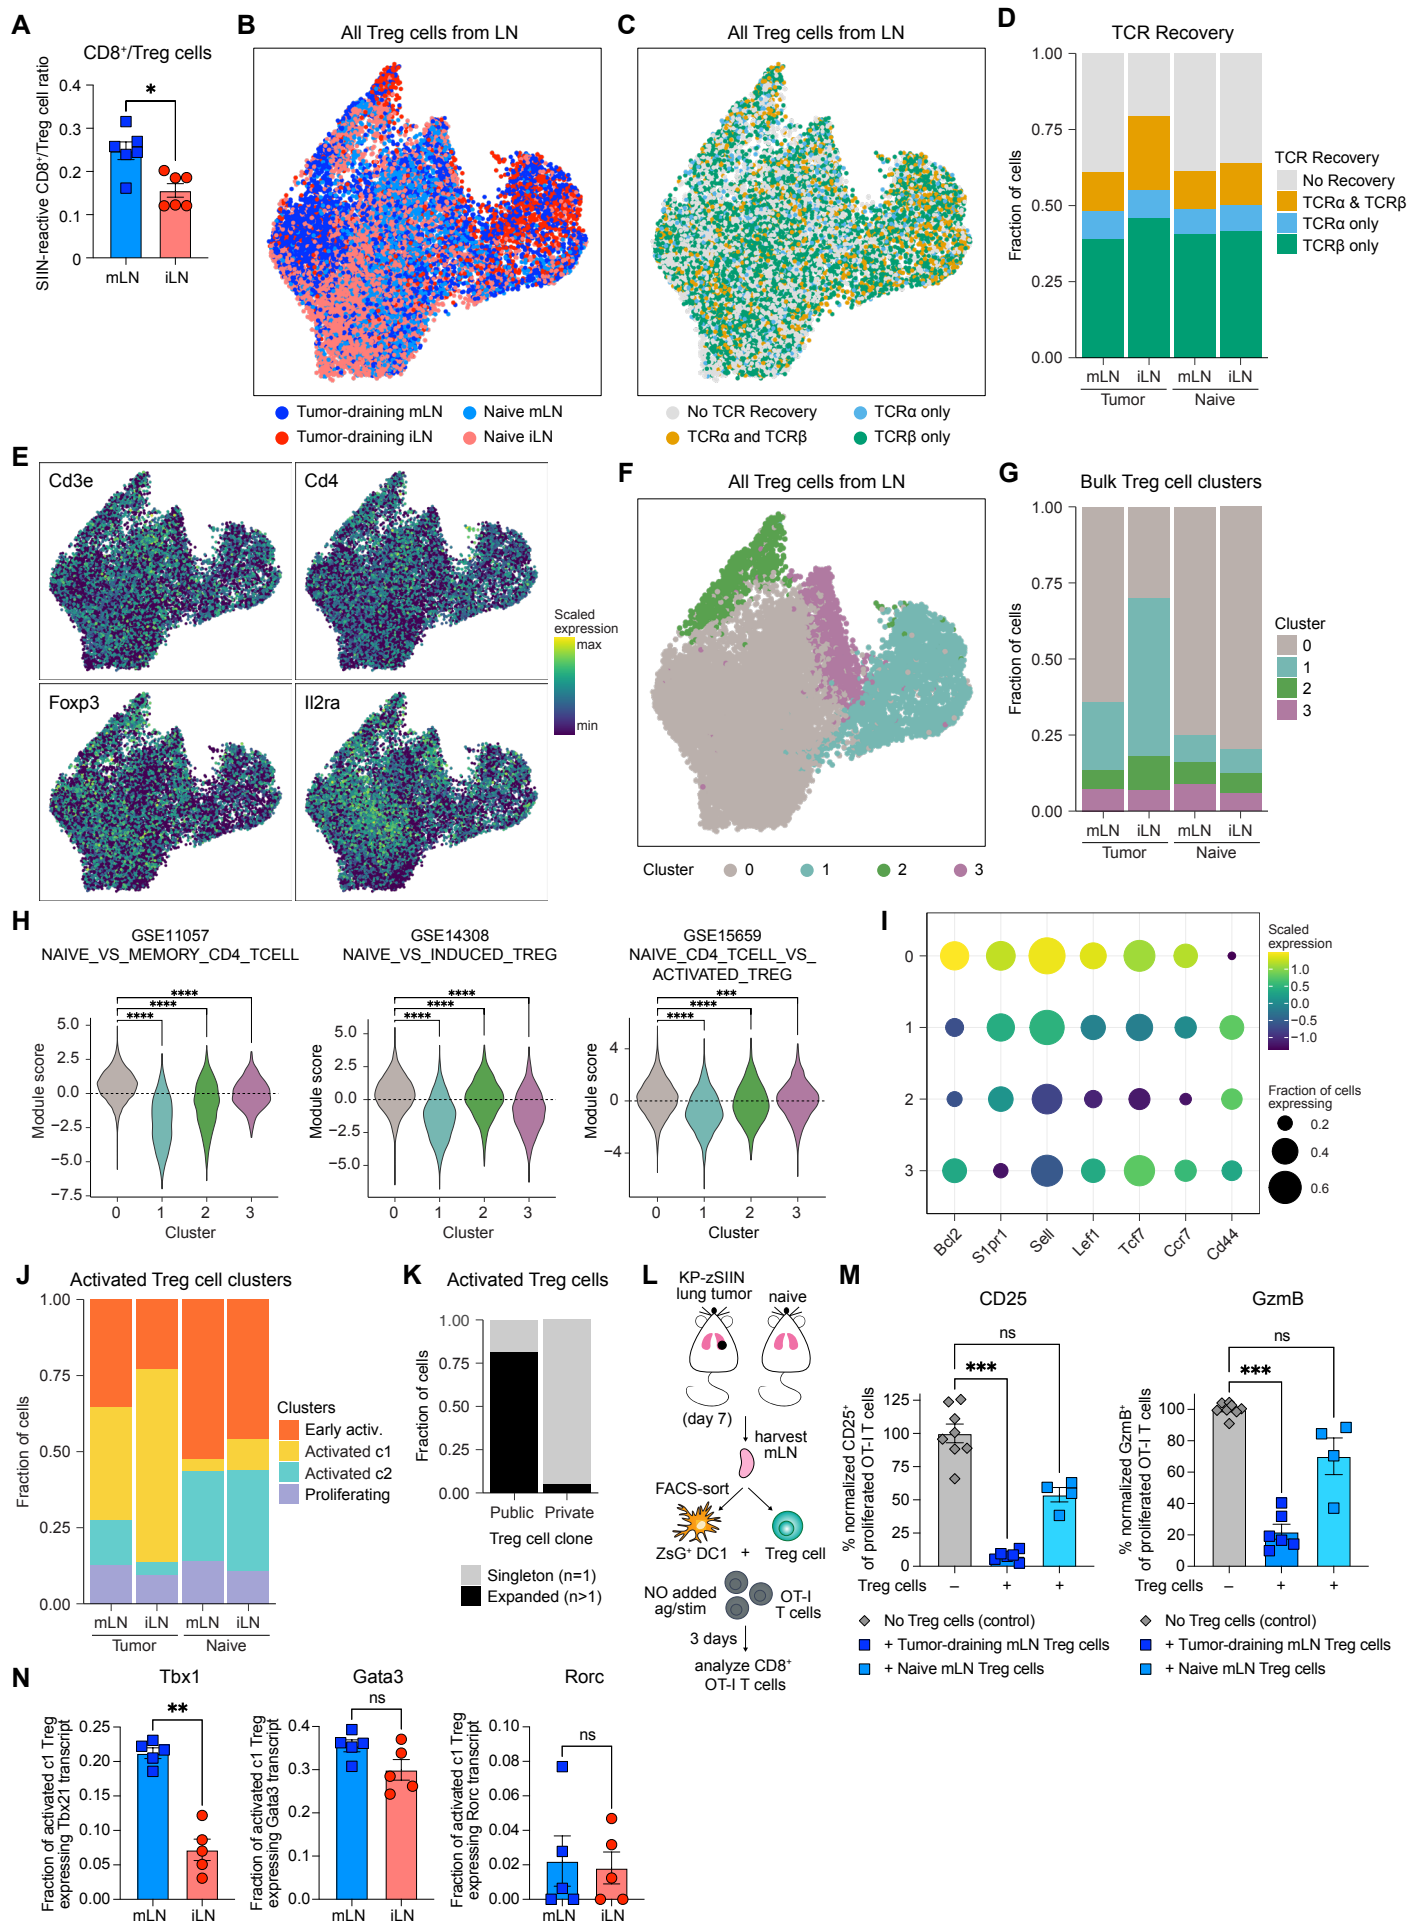

**Figure S3. Related to Main Figure 6: T<sub>H</sub>1-like Treg cells clonally expand in tdLN and are associated with suppression.**

(A) SIIN-reactive CD8<sup>+</sup>/Treg cell ratios in tdLN, day 7 post-tumor implantation (n=3 mice/group; two independent experiments).

(B) UMAP plot of all Treg cells from naïve and tdLN colored by tumor status and location (tdLN, n=5 mice/group; naïve LN, n=20 mice/group).

(C-D) Treg cell TCR recovery (C) mapped onto UMAP plot and (D) quantified as stacked bar chart for naïve and tdLN.

(E) UMAP feature plots of canonical Treg cell markers including *Cd3e*, *Cd4*, *FoxP3* and *Il2ra*.

(F-G) Treg cell cluster composition displayed on (F) UMAP plot and (G) stacked bar charts for naïve and tdLN.

(H) Violin plots of Treg cell cluster enrichment for naïve T cell gene sets.

(I) Dot plot of select naïve T cell marker genes displaying average expression and frequency of expression for each gene.

(J) Stacked bar plots depicting relative frequencies of activated Treg cell clusters across naïve and tdLN.

(K) Stacked bar plot of Treg cell expansion across public and private activated Treg cell clones. Expanded clones were defined as multiple cells recovered from the same mouse containing identical CDR3 $\beta$  junction nucleotide sequences.

(L) Experimental design for (M).

(M) CD25 and GzmB expression on proliferated OT-I T cells after 3-day co-culture with mLN-sorted ZsG<sup>+</sup> DC1 and Treg cells isolated from tumor-draining or naïve mLN (40-70 mLN pooled for sorting, two independent experiments).

(N) *Tbx21*, *Gata3* and *Rorc* transcript expression on activated c1 Treg cells from tdLN, day 7 post-tumor implantation (n=5 mice/group).

\*\*p<0.01, \*\*\*p<0.001, \*\*\*\*p<0.0001, ns=not significant; MWU (H,N), KW (M).

# Figure S4

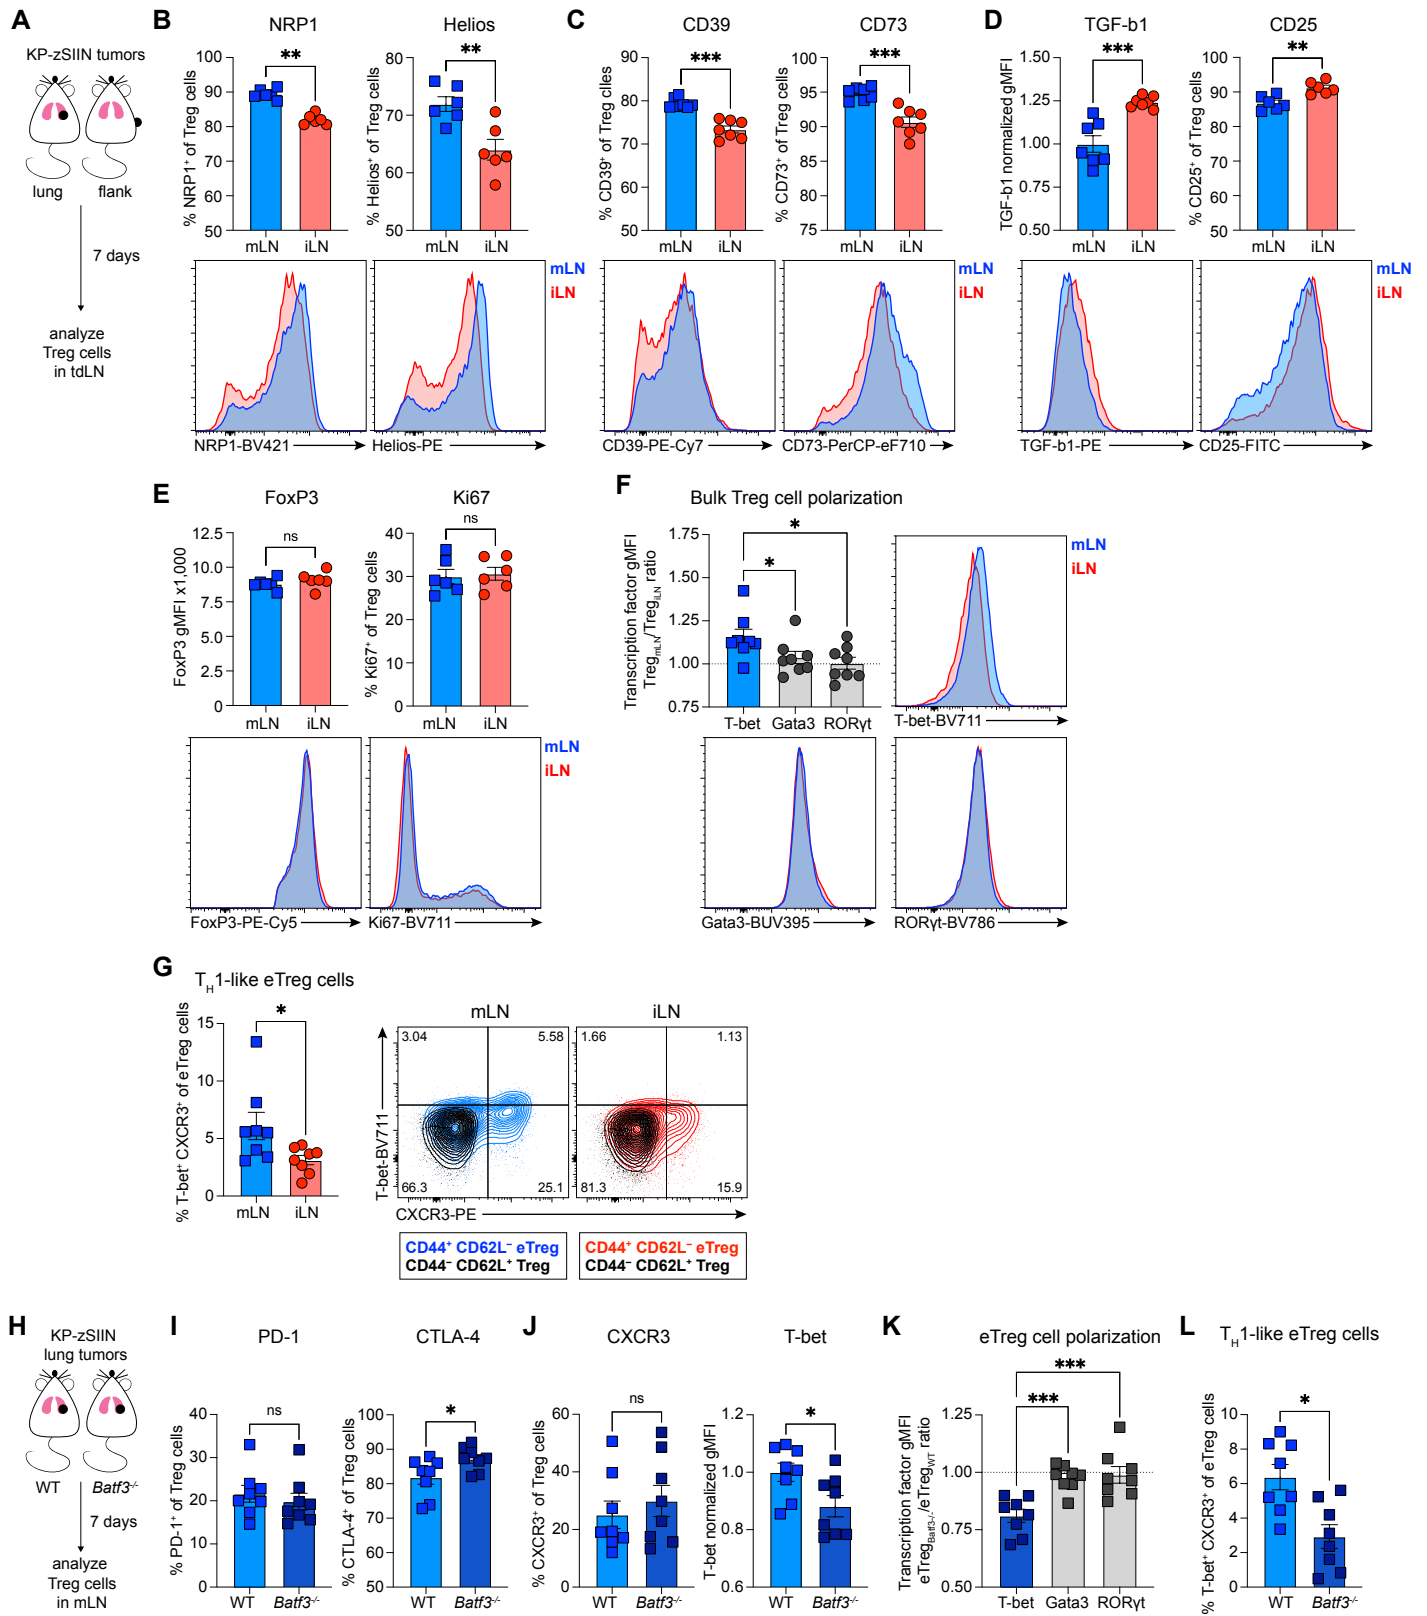

**Figure S4. Related to Main Figure 6: Characterization of Treg cells from tumor-draining mLN and iLN.**

(A) Experimental design for (B-G).

(B-E) Representative histograms and expression of (B) NRP1, Helios, (C) CD39, CD73, (D) TGF- $\beta$ 1, CD25, (E) FoxP3 and Ki67 on Treg cells from tdLN, day 7 post-tumor implantation (n=3-4 mice/group; two independent experiments).

(F) Representative histograms and ratios of transcription factor gMFI values for bulk Treg cells from tdLN, day 7 post-tumor implantation (n=4 mice/group; two independent experiments).

(G) Representative flow plots and frequency of the T-bet<sup>+</sup> CXCR3<sup>+</sup> double-positive fraction of eTreg cells from tdLN, day 7 post-tumor implantation (n=4 mice/group; two independent experiments).

(H) Experimental design for (I-L).

(I-J) Expression of (I) PD-1, CTLA-4, (J) CXCR3 and T-bet on Treg cells from mLN of tumor-bearing WT and *Batf3*<sup>-/-</sup> mice, day 7 post-tumor implantation (n=4 mice/group; two independent experiments).

(K) Ratios of transcription factor gMFI values measured on eTreg cells from mLN of tumor-bearing WT and *Batf3*<sup>-/-</sup> mice, day 7 post-tumor implantation (n=4 mice/group; two independent experiments).

(L) Frequency of the T-bet<sup>+</sup> CXCR3<sup>+</sup> double-positive fraction of eTreg cells from mLN of tumor-bearing WT and *Batf3*<sup>-/-</sup> mice, day 7 post-tumor implantation (n=4 mice/group; two independent experiments).

\*p<0.05, \*\*p<0.01, \*\*\*p<0.001, ns=not significant; MWU (B-G,I-L).

# Figure S5

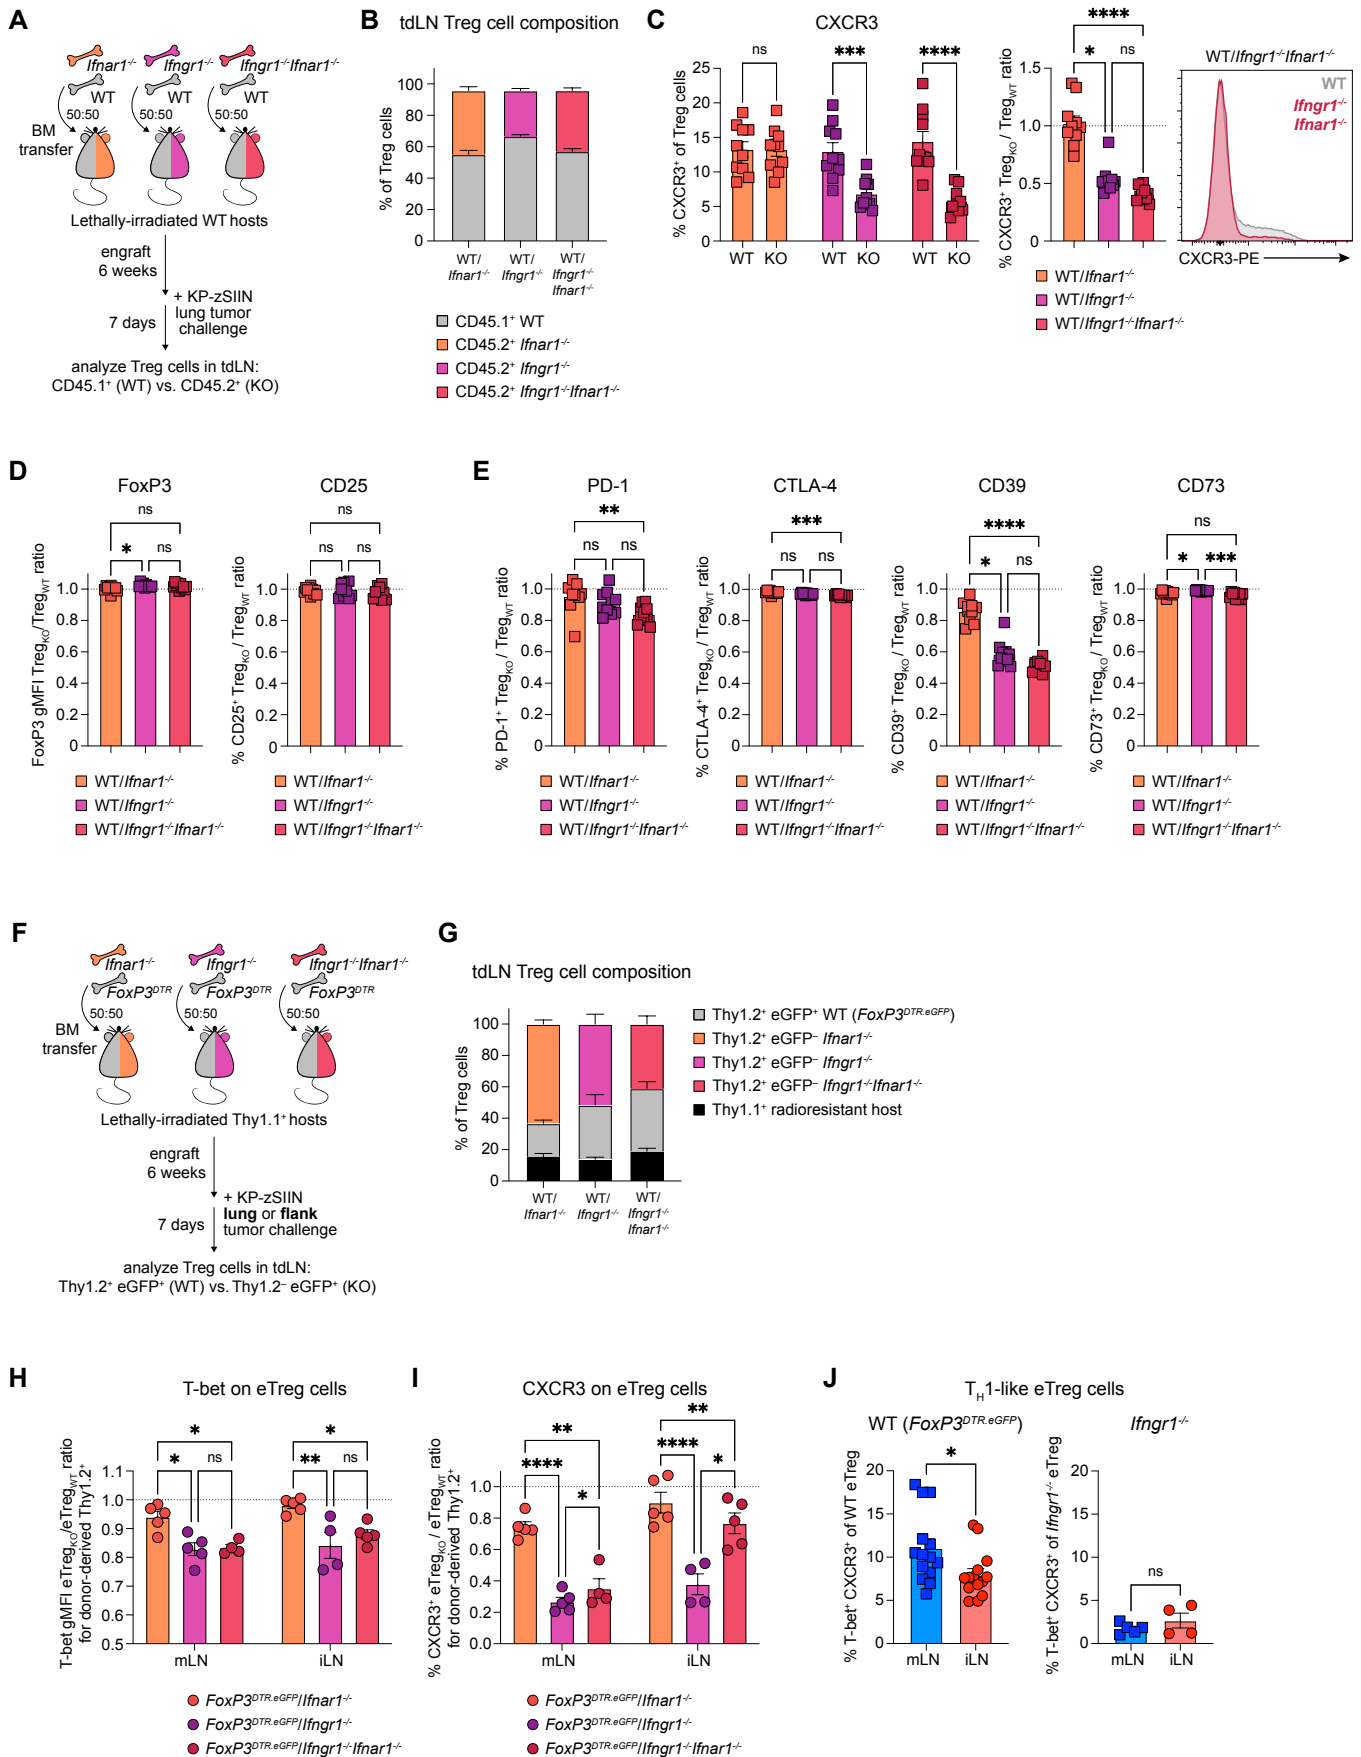

**Figure S5. Related to Main Figure 7: Induction of T<sub>H</sub>1-like Treg cells is dependent on IFN $\gamma$ -sensing.**

(A) Experimental design for (B-E).

(B) Treg cell composition in mLN of tumor-bearing WT/*Ifnar1*<sup>-/-</sup>, WT/*Ifngr1*<sup>-/-</sup> and WT/*Ifngr1*<sup>-/-</sup>/*Ifnar1*<sup>-/-</sup> BMCs, day 7 post-tumor implantation (n=5 mice/group; two independent experiments).

(C) Representative histogram and CXCR3 expression on WT and IFN receptor-deficient (KO) Treg cells from mLN of tumor-bearing WT/*Ifnar1*<sup>-/-</sup>, WT/*Ifngr1*<sup>-/-</sup> and WT/*Ifngr1*<sup>-/-</sup>/*Ifnar1*<sup>-/-</sup> BMCs, day 7 post-tumor implantation (n=5 mice/group; two independent experiments).

(D-E) Ratios of IFN receptor-deficient (KO) and WT Treg cell expression of (D) FoxP3, CD25, (E) PD-1, CTLA-4, CD39 and CD73 in mLN of tumor-bearing WT/*Ifnar1*<sup>-/-</sup>, WT/*Ifngr1*<sup>-/-</sup> and WT/*Ifngr1*<sup>-/-</sup>/*Ifnar1*<sup>-/-</sup> BMCs, day 7 post-tumor implantation (n=5 mice/group; two independent experiments).

(F) Experimental design for (G-J).

(G) Treg cell composition in tdLN of tumor-bearing *FoxP3*<sup>DTR</sup>/*Ifnar1*<sup>-/-</sup>, *FoxP3*<sup>DTR</sup>/*Ifngr1*<sup>-/-</sup> and *FoxP3*<sup>DTR</sup>/*Ifngr1*<sup>-/-</sup>/*Ifnar1*<sup>-/-</sup> BMCs, day 7 post-tumor implantation (n=4-5 mice/group; two independent experiments).

(H-I) Ratios of Thy1.2<sup>+</sup> donor-derived IFN receptor-deficient (KO) and WT eTreg cell expression of (H) T-bet and (I) CXCR3 in tdLN of tumor-bearing *FoxP3*<sup>DTR</sup>/*Ifnar1*<sup>-/-</sup>, *FoxP3*<sup>DTR</sup>/*Ifngr1*<sup>-/-</sup> and *FoxP3*<sup>DTR</sup>/*Ifngr1*<sup>-/-</sup>/*Ifnar1*<sup>-/-</sup> BMCs, day 7 post-tumor implantation (n=2-3 mice/group; two independent experiments).

(J) T-bet<sup>+</sup> CXCR3<sup>+</sup> double-positive percentage of eTreg cells for (left) Thy1.2<sup>+</sup> eGFP<sup>+</sup> donor-derived WT fraction from tumor-bearing *FoxP3*<sup>DTR</sup>/*Ifnar1*<sup>-/-</sup>, *FoxP3*<sup>DTR</sup>/*Ifngr1*<sup>-/-</sup> and *FoxP3*<sup>DTR</sup>/*Ifngr1*<sup>-/-</sup>/*Ifnar1*<sup>-/-</sup> BMCs and (right) Thy1.2<sup>+</sup> eGFP<sup>-</sup> fraction from tumor-bearing *FoxP3*<sup>DTR</sup>/*Ifngr1*<sup>-/-</sup> BMCs, from tdLN at day 7 post-tumor implantation (n=2-7 mice/group; two independent experiments).

\*p<0.05, \*\*p<0.01, \*\*\*p<0.001, \*\*\*\*p<0.0001, ns=not significant; two-way ANOVA (C, left; G-H), KW (C, middle; D), MWU (I). Data shown as mean  $\pm$  SEM.

# Figure S6

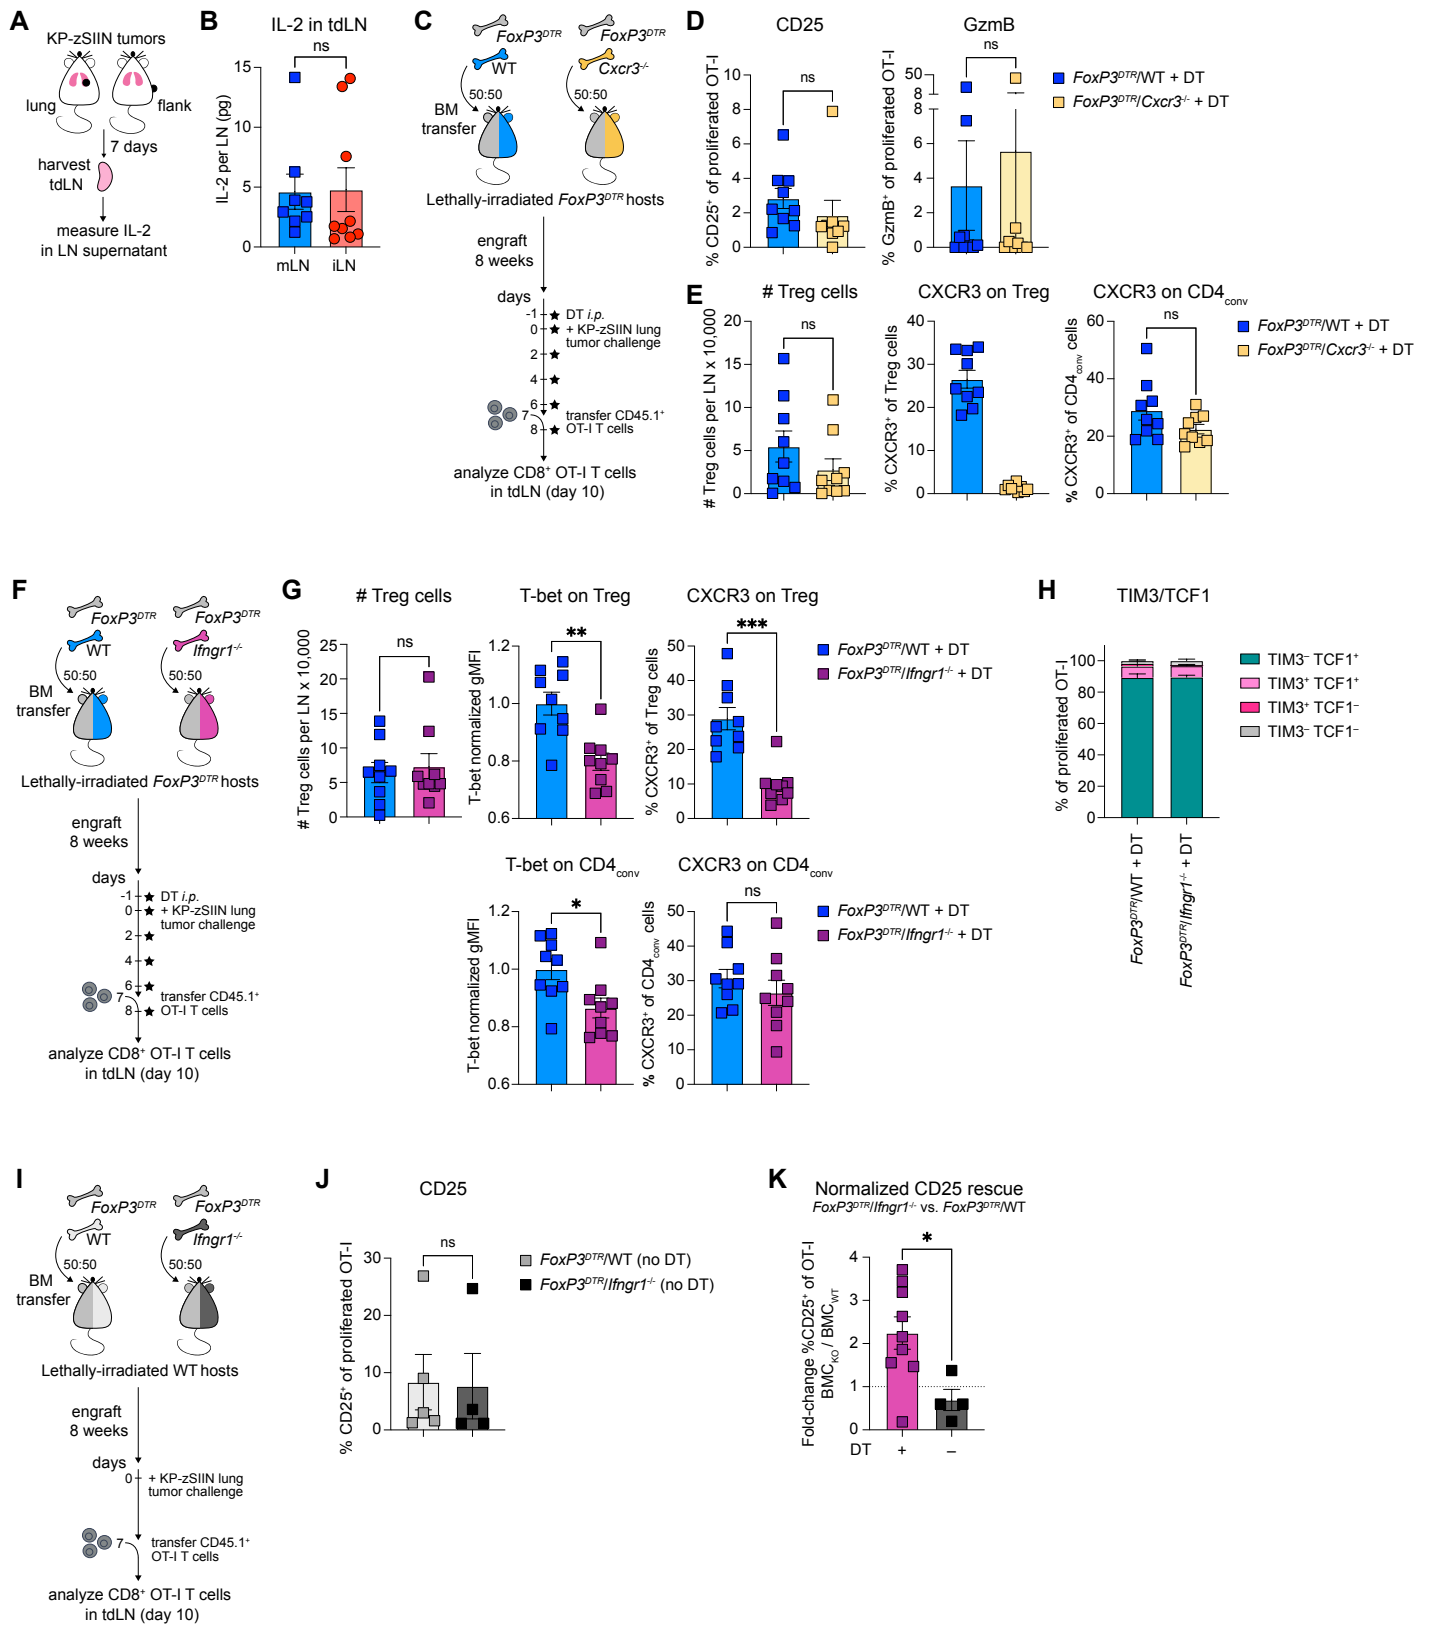

**Figure S6. Related to Main Figure 7: IFN $\gamma$ -sensing in Treg cells drives dysfunctional CD8<sup>+</sup> T cell responses against lung cancer.**

(A) Experimental design for (B).

(B) IL-2 quantification in tdLN, day 7 post-tumor implantation (n=2-3 mice/group; three independent experiments).

(C) Experimental design for (D-E).

(D-E) Expression of (D) CD25 and GzmB on adoptively-transferred proliferated OT-I T cells and (E) numbers of Treg cells and CXCR3 expression on Treg cells and CD4<sub>conv</sub> cells from mLN of DT-treated tumor-bearing *FoxP3<sup>DTR</sup>/WT* or *FoxP3<sup>DTR</sup>/Cxcr3<sup>-/-</sup>* BMCs, day 10 post-tumor implantation (n=3 mice/group; three independent experiments).

(F) Experimental design for (G-H).

(G) Numbers of Treg cells and expression of T-bet and CXCR3 on Treg cells and CD4<sub>conv</sub> cells from mLN of DT-treated tumor-bearing *FoxP3<sup>DTR</sup>/WT* or *FoxP3<sup>DTR</sup>/Ifngr1<sup>-/-</sup>* BMCs, day 10 post-tumor implantation (n=3 mice/group; three independent experiments).

(H) TCF1 and TIM-3 expression on adoptively-transferred proliferated OT-I T cells from mLN of DT-treated tumor-bearing *FoxP3<sup>DTR</sup>/WT* or *FoxP3<sup>DTR</sup>/Ifngr1<sup>-/-</sup>* BMCs, day 10 post-tumor implantation (n=3 mice/group; three independent experiments).

(I) Experimental design for (J).

(J) CD25 expression on adoptively-transferred proliferated OT-I T cells from mLN of untreated tumor-bearing *FoxP3<sup>DTR</sup>/WT* or *FoxP3<sup>DTR</sup>/Ifngr1<sup>-/-</sup>* BMCs, day 10 post-tumor implantation (n=2-3 mice/group; two independent experiments).

(K) Normalized CD25 expression on adoptively-transferred proliferated OT-I T cells (values from untreated *FoxP3<sup>DTR</sup>/WT* BMCs were divided by values from untreated *FoxP3<sup>DTR</sup>/Ifngr1<sup>-/-</sup>* BMCs; normalization was performed separately for each independent replicate for the DT-treated condition in Fig. 7I and for the untreated control experiment in Figure S6J), (n=2-3 mice/group; two independent experiments).

\*p<0.05, \*\*p<0.01, \*\*\*p<0.001, ns=not significant; MWU (B,D-E,G,J-K). Data shown as mean  $\pm$  SEM.



# Figure S7

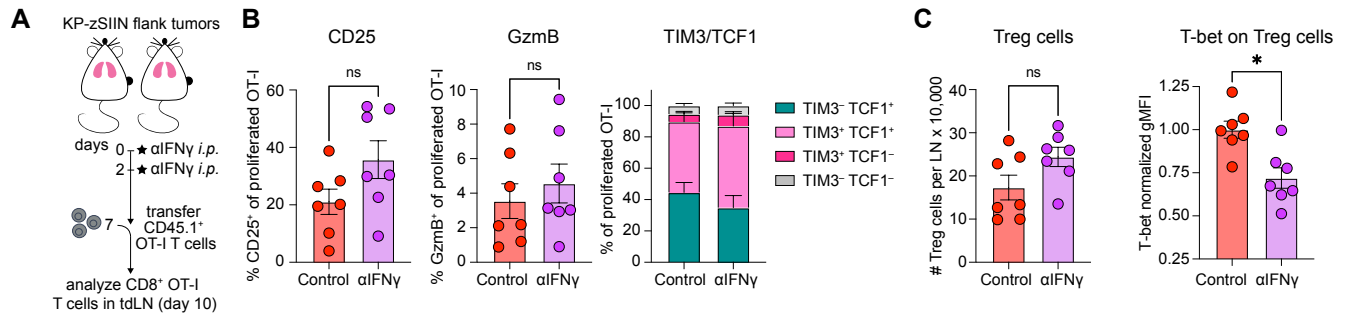

**D** Sade-Feldman *et al. Cell* 2018

NR = non-responder; R = responder

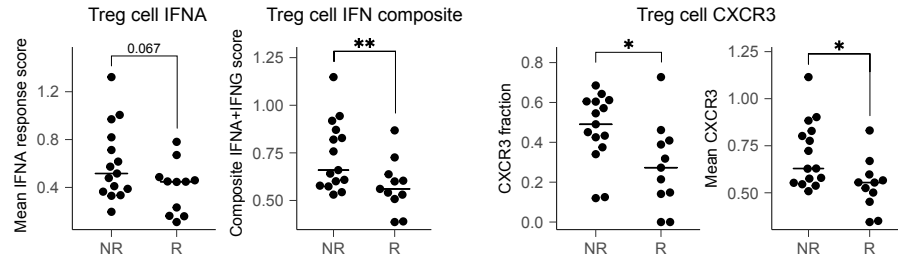

**Figure S7. Related to Main Figure 7: IFN $\gamma$  blockade has no effect on CD8<sup>+</sup> T cell responses in the iLN and T<sub>H</sub>1-like Treg cells correlate with ICB resistance in patients with melanoma.**

(A) Experimental design for (B-C).

(B-C) Expression of (B) CD25, GzmB, TIM3 and TCF1 on adoptively-transferred proliferated OT-I T cells and (C) numbers and T-bet expression for Treg cells from iLN of control and  $\alpha$ IFN $\gamma$ -treated tumor-bearing mice, day 10 post-tumor implantation (n=3-4 mice/group; two independent experiments).

(D) Reanalysis of human melanoma T cell scRNA-seq data from Sade-Feldman *et al.* (2018); IFNA and composite IFNA+IFNG response hallmark signature scores and CXCR3 expression on intratumoral Treg cells from melanoma patients, including ICB-responders (R) and ICB-non-responders (NR).

\*p<0.05, \*\*p<0.01, ns=not significant; MWU (B-D). Data shown as mean  $\pm$  SEM, except in (D) where the median is shown.
